# Supplementary material
Source: bioRxiv or medRxiv preprint supplement (https://www.biorxiv.org/highwire/filestream/17135/field_highwire_adjunct_files/2/062455-3.pdf)
Supplement: Supplementary file [file 062455-3.pdf]

# Independent

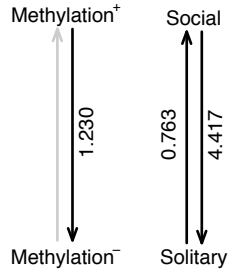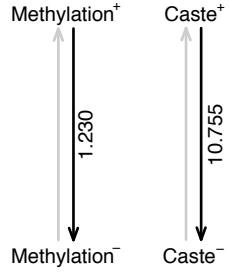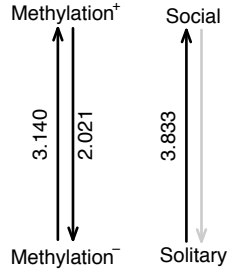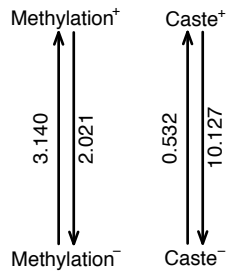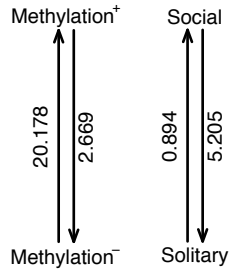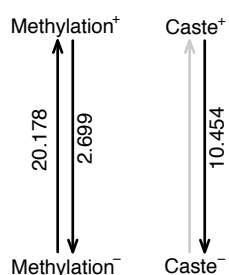

# Dependent

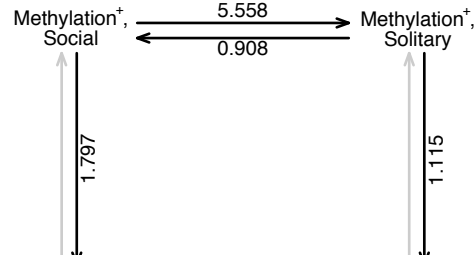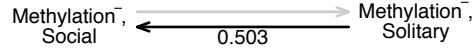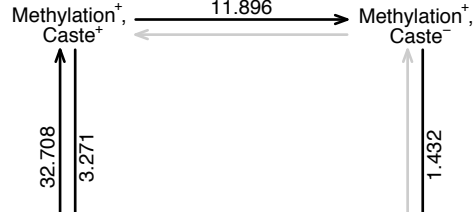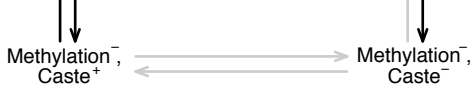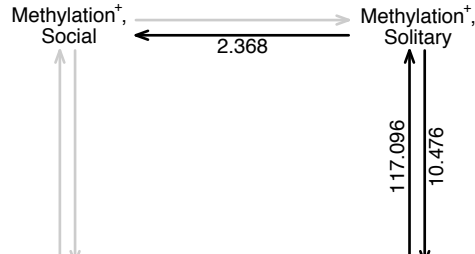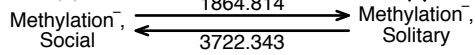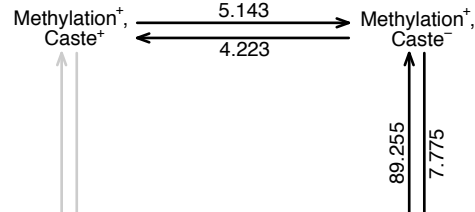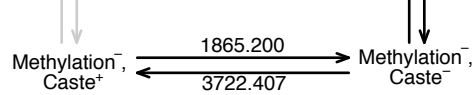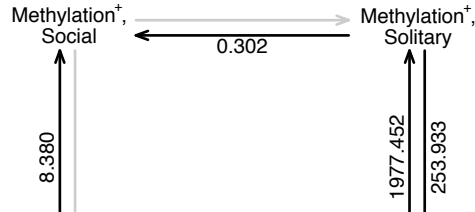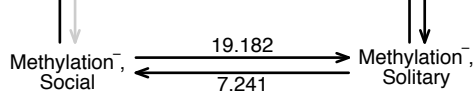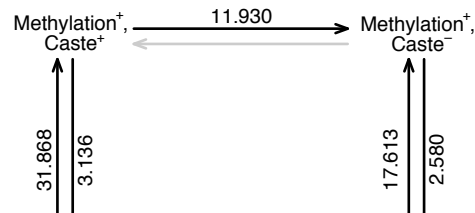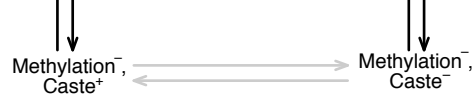

Insecta+Diplura+Crustacea

Hymenoptera

Diptera-
